# Supplementary material
Source: ML conference proceedings conference paper supplement (https://proceedings.mlr.press/v216/zheng23a.html)
Supplement: Supplementary file 1 [file zheng23a-supp.pdf]

# RDM-DC: Poisoning Resilient Dataset Condensation with Robust Distribution Matching (Supplementary Material)

Tianhang Zheng<sup>1</sup>

Baochun Li<sup>1</sup>

<sup>1</sup>Department of Electrical and Computer Engineering, University of Toronto

## 1 OMITTED PROOF ■

**Lemma 1.1** *Assuming that  $\mathcal{D}$  and  $\mathcal{B}$  have bounded covariance matrices  $\Sigma_{\mathcal{D}}, \Sigma_{\mathcal{B}} \leq \sigma^2 \mathbf{I}$ , and their means have an apparent difference, i.e.,  $\|\mu_{\mathcal{D}} - \mu_{\mathcal{B}}\|_2^2 \geq \frac{\alpha\sigma^2}{\epsilon}$  where  $\alpha > \frac{2665}{576}$ , then if we drop all the representations that satisfies  $|\langle \mathbf{r} - \mu_{\mathcal{P}}, \mathbf{v} \rangle| \geq t$  with a certain  $t$ , then we can reduce the scale of the poisoned deviation from  $O(\epsilon\sqrt{d_r})$  to  $\Theta(\epsilon^2\sqrt{d_r})$ .*

To prove the above lemma, we need the help of Chebyshev's inequality, which is introduced in the following.

**Lemma 1.2 (Chebyshev's inequality)** *Given a scalar random variable  $X$ , if  $\mathbb{E}[X] = \mu$  and  $\text{Var}[X] = \sigma^2$ , then*

$$\mathbb{P}(|X - \mu| \geq t) \leq \frac{\sigma^2}{t^2} \quad (1)$$

Given Chebyshev's inequality, we have the following corollary, which will be used in the proof of Lemma 1.1.

**Corollary 1.1** *Given a multi-dimensional variable  $\mathbf{X}$ , if  $\mathbb{E}[\mathbf{X}] = \boldsymbol{\mu}$  and  $\text{Cov}[\mathbf{X}] \leq \sigma^2 \mathbf{I}$ , then for any unit vector  $\mathbf{u}$ , we have*

$$\mathbb{P}(|\langle \mathbf{X} - \boldsymbol{\mu}, \mathbf{u} \rangle| > t) \leq \frac{\sigma^2}{t^2} \quad (2)$$

**Proof** [Proof of Corollary 1.1]

Considering  $\langle \mathbf{X}, \mathbf{u} \rangle$  as a scalar random variable, we have  $\mathbb{E}[\langle \mathbf{X}, \mathbf{u} \rangle] = \langle \boldsymbol{\mu}, \mathbf{u} \rangle$  and,

$$\text{Var}[\langle \mathbf{X}, \mathbf{u} \rangle] = \mathbf{u}^T \text{Cov}[\mathbf{X}] \mathbf{u} \leq \sigma^2. \quad (3)$$

With Chebyshev's inequality, we know that

$$\mathbb{P}(|\langle \mathbf{X}, \mathbf{u} \rangle - \langle \boldsymbol{\mu}, \mathbf{u} \rangle| \geq t) \leq \frac{\text{Var}[\langle \mathbf{X}, \mathbf{u} \rangle]}{t^2} \leq \frac{\sigma^2}{t^2} \quad (4)$$

Beyond Corollary 1.1, we also need to use the following lemma and corollary in the proof of Lemma 1.1.

**Lemma 1.3** *Given two distributions  $P$  and  $Q$  with mean  $\mu_P$  and  $\mu_Q$  and covariance matrices  $\Sigma_P, \Sigma_Q \leq \sigma^2 \mathbf{I}$ , if  $\|\mu_P - \mu_Q\|_2^2 \geq \frac{\alpha\sigma^2}{\epsilon}$ , then  $\langle \mathbf{v}, \mu_P - \mu_Q \rangle^2 \geq \frac{\alpha\sigma^2 - \sigma^2/(1-\epsilon)}{\epsilon}$  where  $\mathbf{v}$  is the first eigenvector of the covariance matrix of  $(1-\epsilon)P + \epsilon Q$ .*

**Proof** [Proof of Lemma 1.3] The mean of the mixture  $(1-\epsilon)P + \epsilon Q$  is  $(1-\epsilon)\mu_P + \epsilon\mu_Q$ , which is denoted by  $\mu_M$ . We denote  $\mu_P - \mu_Q$  by  $\delta$ . The covariance matrix of  $(1-\epsilon)P + \epsilon Q$  can be expressed as

$$\begin{aligned} \mathbb{E}_{\mathbf{X} \sim (1-\epsilon)P + \epsilon Q}[(\mathbf{X} - \mu_M)(\mathbf{X} - \mu_M)^T] \\ = (1-\epsilon)\mathbb{E}_{\mathbf{X} \sim P}[(\mathbf{X} - \mu_M)(\mathbf{X} - \mu_M)^T] \\ + \epsilon\mathbb{E}_{\mathbf{X} \sim Q}[(\mathbf{X} - \mu_M)(\mathbf{X} - \mu_M)^T] \end{aligned} \quad (5)$$

Since we have

$$\begin{aligned} \mathbb{E}_{\mathbf{X} \sim P}[(\mathbf{X} - \mu_M)(\mathbf{X} - \mu_M)^T] \\ = \mathbb{E}_{\mathbf{X} \sim P}[(\mathbf{X} - \mu_P + \epsilon\delta)(\mathbf{X} - \mu_P + \epsilon\delta)^T] \\ = \Sigma_P + \epsilon^2\delta\delta^T \\ \mathbb{E}_{\mathbf{X} \sim Q}[(\mathbf{X} - \mu_M)(\mathbf{X} - \mu_M)^T] \\ = \mathbb{E}_{\mathbf{X} \sim Q}[(\mathbf{X} - \mu_Q - (1-\epsilon)\delta)(\mathbf{X} - \mu_Q - (1-\epsilon)\delta)^T] \\ = \Sigma_Q + (1-\epsilon)^2\delta\delta^T, \end{aligned}$$

we have a lower bound on the covariance matrix of the mixture  $(1-\epsilon)P + \epsilon Q$  as

$$\begin{aligned} \Sigma_M = \mathbb{E}_{\mathbf{X} \sim (1-\epsilon)P + \epsilon Q}[(\mathbf{X} - \mu_M)(\mathbf{X} - \mu_M)^T] \\ = (1-\epsilon)\Sigma_P + \epsilon\Sigma_Q + \epsilon(1-\epsilon)\delta\delta^T \geq \epsilon(1-\epsilon)\delta\delta^T. \end{aligned} \quad (6)$$

Suppose that  $\mathbf{v}$  is the first eigenvector of  $\Sigma_M$  and  $\mathbf{u} = \frac{\delta}{\|\delta\|_2}$ , we then have

$$\mathbf{v}^T \Sigma_M \mathbf{v} \geq \mathbf{u}^T \Sigma_M \mathbf{u} \geq \epsilon(1-\epsilon) \mathbf{u}^T \delta \delta^T \mathbf{u} = \epsilon(1-\epsilon) \|\delta\|_2^2. \quad (7)$$

Since  $\Sigma_P, \Sigma_Q \leq \sigma^2 \mathbf{I}$ , we also have

$$\begin{aligned} \mathbf{v}^T \Sigma_M \mathbf{v} &= (1-\epsilon) \mathbf{v}^T \Sigma_P \mathbf{v} + \epsilon \mathbf{v}^T \Sigma_Q \mathbf{v} + \epsilon(1-\epsilon) \mathbf{v}^T \delta \delta^T \mathbf{v} \\ &\leq \sigma^2 + \epsilon(1-\epsilon) \langle \mathbf{v}, \delta \rangle^2 \end{aligned} \quad (8)$$

Thus, we have

$$\langle \mathbf{v}, \delta \rangle^2 \geq \frac{\mathbf{v}^T \Sigma_M \mathbf{v} - \sigma^2}{\epsilon(1-\epsilon)} \geq \|\delta\|_2^2 - \frac{\sigma^2}{\epsilon(1-\epsilon)} \quad (9)$$

Given the assumption that  $\|\delta\|_2^2 \geq \frac{\alpha \sigma^2}{\epsilon}$ ,

$$\langle \mathbf{v}, \delta \rangle^2 \geq \frac{\alpha \sigma^2 - \sigma^2 / (1-\epsilon)}{\epsilon} \quad (10)$$

■

Based on Lemma 1.3, we have the following corollary.

**Corollary 1.2** *Given the definitions and conditions in Lemma 1.3, if  $\epsilon \leq \frac{1}{10}$  and  $\alpha > \frac{2665}{576}$ , then we have  $(1-2\epsilon) |\langle \delta, \mathbf{v} \rangle| > \frac{3\sigma}{2\sqrt{\epsilon}}$ .*

**Proof** Given Lemma 1.3, we have

$$(1-2\epsilon) |\langle \delta, \mathbf{v} \rangle| \geq (1-2\epsilon) \sqrt{\alpha - \frac{1}{1-\epsilon}} \frac{\sigma}{\sqrt{\epsilon}} \quad (11)$$

Since  $1-2\epsilon$  and  $-\frac{1}{1-\epsilon}$  are decreasing functions w.r.t.  $\epsilon$ , they achieve the minimum at  $\epsilon = \frac{1}{10}$ . Thus, we have

$$(1-2\epsilon) |\langle \delta, \mathbf{v} \rangle| \geq \frac{4}{5} \sqrt{\alpha - \frac{10}{9}} \frac{\sigma}{\sqrt{\epsilon}}. \quad (12)$$

So if  $\alpha > \frac{2665}{576}$ , we have  $(1-2\epsilon) |\langle \delta, \mathbf{v} \rangle| > \frac{3\sigma}{2\sqrt{\epsilon}}$ . ■

**Proof** [Proof of Lemma 1.1] The mean of the poisoned representation distribution  $\mathcal{P}$  is  $\mu_P = (1-\epsilon)\mu_D + \epsilon\mu_B$ . Let  $\delta = \mu_B - \mu_D$  and  $t = |\epsilon\langle \delta, \mathbf{v} \rangle| + \frac{\sigma}{\sqrt{\epsilon}}$ . We denote the covariance matrix of  $\mathcal{P}$  by  $\Sigma_P$  and its first eigenvector by  $\mathbf{v}$ .

For the original representation distribution, we have

$$\begin{aligned} \mathbb{P}_{\mathbf{r} \sim \mathcal{D}}[|\langle \mathbf{r} - \mu_P, \mathbf{v} \rangle| > t] \\ &= \mathbb{P}_{\mathbf{r} \sim \mathcal{D}}[|\langle \mathbf{r} - \mu_D, \mathbf{v} \rangle - \epsilon\langle \delta, \mathbf{v} \rangle| > t] \quad \textcircled{1} \\ &\leq \mathbb{P}_{\mathbf{r} \sim \mathcal{D}}[|\langle \mathbf{r} - \mu_D, \mathbf{v} \rangle| > \frac{\sigma}{\sqrt{\epsilon}}] \quad \textcircled{2} \\ &\leq \epsilon \quad \textcircled{3} \end{aligned} \quad (13)$$

① is because  $\mu_P = \mu_D + \epsilon\delta$ . ② is because if  $|\langle \mathbf{r} - \mu_D, \mathbf{v} \rangle - \epsilon\langle \delta, \mathbf{v} \rangle| > t$ , then either  $\langle \mathbf{r} - \mu_D, \mathbf{v} \rangle > t + \epsilon\langle \delta, \mathbf{v} \rangle > \frac{\sigma}{\sqrt{\epsilon}}$  or  $\langle \mathbf{r} - \mu_D, \mathbf{v} \rangle < -t + \epsilon\langle \delta, \mathbf{v} \rangle < -\frac{\sigma}{\sqrt{\epsilon}}$  holds true. Thus, we have  $|\langle \mathbf{r} - \mu_D, \mathbf{v} \rangle| > \frac{\sigma}{\sqrt{\epsilon}}$ , and  $\{\mathbf{r}, |\langle \mathbf{r} - \mu_D, \mathbf{v} \rangle - \epsilon\langle \delta, \mathbf{v} \rangle| > t\} \subseteq \{\mathbf{r}, |\langle \mathbf{r} - \mu_D, \mathbf{v} \rangle| > \frac{\sigma}{\sqrt{\epsilon}}\}$ . Therefore, ② holds true.

③ is because of Corollary 1.1.

For the poisoned distribution, we have

$$\begin{aligned} \mathbb{P}_{\mathbf{r} \sim \mathcal{B}}[|\langle \mathbf{r} - \mu_P, \mathbf{v} \rangle| < t] \\ &= \mathbb{P}_{\mathbf{r} \sim \mathcal{B}}[|\langle \mathbf{r} - \mu_B, \mathbf{v} \rangle + (1-\epsilon)\langle \delta, \mathbf{v} \rangle| < t] \quad \textcircled{1} \\ &\leq \mathbb{P}_{\mathbf{r} \sim \mathcal{B}}[|\langle \mathbf{r} - \mu_B, \mathbf{v} \rangle| > (1-2\epsilon)|\langle \delta, \mathbf{v} \rangle| - \frac{\sigma}{\sqrt{\epsilon}}] \quad \textcircled{2} \\ &\leq \mathbb{P}_{\mathbf{r} \sim \mathcal{B}}[|\langle \mathbf{r} - \mu_B, \mathbf{v} \rangle| > \frac{\sigma}{2\sqrt{\epsilon}}] \leq 4\epsilon \quad \textcircled{3} \end{aligned} \quad (14)$$

① is because  $\mu_P = \mu_B - (1-\epsilon)\delta$ . In the following, we prove ②: Given  $|\langle \mathbf{r} - \mu_B, \mathbf{v} \rangle + (1-\epsilon)\langle \delta, \mathbf{v} \rangle| < t$ , we have  $-t - (1-\epsilon)\langle \delta, \mathbf{v} \rangle < \langle \mathbf{r} - \mu_B, \mathbf{v} \rangle < t - (1-\epsilon)\langle \delta, \mathbf{v} \rangle$ . Since  $t = |\epsilon\langle \delta, \mathbf{v} \rangle| + \frac{\sigma}{\sqrt{\epsilon}}$ ,  $-|\epsilon\langle \delta, \mathbf{v} \rangle| - \frac{\sigma}{\sqrt{\epsilon}} - (1-\epsilon)\langle \delta, \mathbf{v} \rangle < \langle \mathbf{r} - \mu_B, \mathbf{v} \rangle < |\epsilon\langle \delta, \mathbf{v} \rangle| + \frac{\sigma}{\sqrt{\epsilon}} - (1-\epsilon)\langle \delta, \mathbf{v} \rangle$ .

Then, we consider two cases: If  $\langle \delta, \mathbf{v} \rangle \geq 0$ , we have  $\langle \mathbf{r} - \mu_B, \mathbf{v} \rangle < \frac{\sigma}{\sqrt{\epsilon}} - (1-2\epsilon)|\langle \delta, \mathbf{v} \rangle|$ . Given Corollary 1.2, we have  $|\langle \mathbf{r} - \mu_B, \mathbf{v} \rangle| > (1-2\epsilon)|\langle \delta, \mathbf{v} \rangle| - \frac{\sigma}{\sqrt{\epsilon}}$ . If  $\langle \delta, \mathbf{v} \rangle < 0$ , we have  $\langle \mathbf{r} - \mu_B, \mathbf{v} \rangle > (1-2\epsilon)|\langle \delta, \mathbf{v} \rangle| - \frac{\sigma}{\sqrt{\epsilon}}$ . Given Corollary 1.2, we also have  $|\langle \mathbf{r} - \mu_B, \mathbf{v} \rangle| > (1-2\epsilon)|\langle \delta, \mathbf{v} \rangle| - \frac{\sigma}{\sqrt{\epsilon}}$ . Therefore, ② holds true. ③ is because of Corollary 1.2.

Suppose after filtering out the data that satisfies  $|\langle \mathbf{r} - \mu_P, \mathbf{v} \rangle| \geq t$ , the remaining deviation caused by  $\mathcal{B}$  is expected to be

$$\begin{aligned} |\epsilon \mathbb{E}_{\mathbf{r} \sim \mathcal{B}, |\langle \mathbf{r} - \mu_P, \mathbf{v} \rangle| < t}[\mathbf{r}]]| &< \epsilon t \mathbb{P}_{\mathbf{r} \sim \mathcal{B}}[|\langle \mathbf{r} - \mu_P, \mathbf{v} \rangle| < t] \\ &\leq 4\epsilon^2 t = 4\epsilon^2 (|\epsilon\langle \delta, \mathbf{v} \rangle| + \frac{\sigma}{\sqrt{\epsilon}}) \end{aligned} \quad (15)$$

Since  $\frac{\sigma}{\sqrt{\epsilon}} \leq \frac{2}{3} |\epsilon\langle \delta, \mathbf{v} \rangle|$  according to Corollary 1.2, we have

$$|\epsilon \mathbb{E}_{\mathbf{r} \sim \mathcal{B}, |\langle \mathbf{r} - \mu_P, \mathbf{v} \rangle| < t}[\mathbf{r}]]| \leq \frac{20}{3} \epsilon^3 |\langle \delta, \mathbf{v} \rangle| \leq \frac{20}{3} \epsilon^3 \|\delta\|_2 \quad (16)$$

Since  $\epsilon \leq \frac{1}{10}$  and  $\|\delta\|_2 \sim \Theta(\sqrt{d_r})$ , we have

$$|\epsilon \mathbb{E}_{\mathbf{r} \sim \mathcal{B}, |\langle \mathbf{r} - \mu_P, \mathbf{v} \rangle| < t}[\mathbf{r}]]| \sim \Theta(\epsilon^2 \sqrt{d_r}). \quad (17)$$

■
